# Supplementary material
Source: MDPI journal article supplement (https://www.mdpi.com/2072-4292/13/4/578)
Supplement: s1 [file s1]

# Mapping and Characterization of Phenological Changes over Various Farming Systems in Arid and Semi-arid Region Using Multitemporal Moderate Spatial Resolution Data

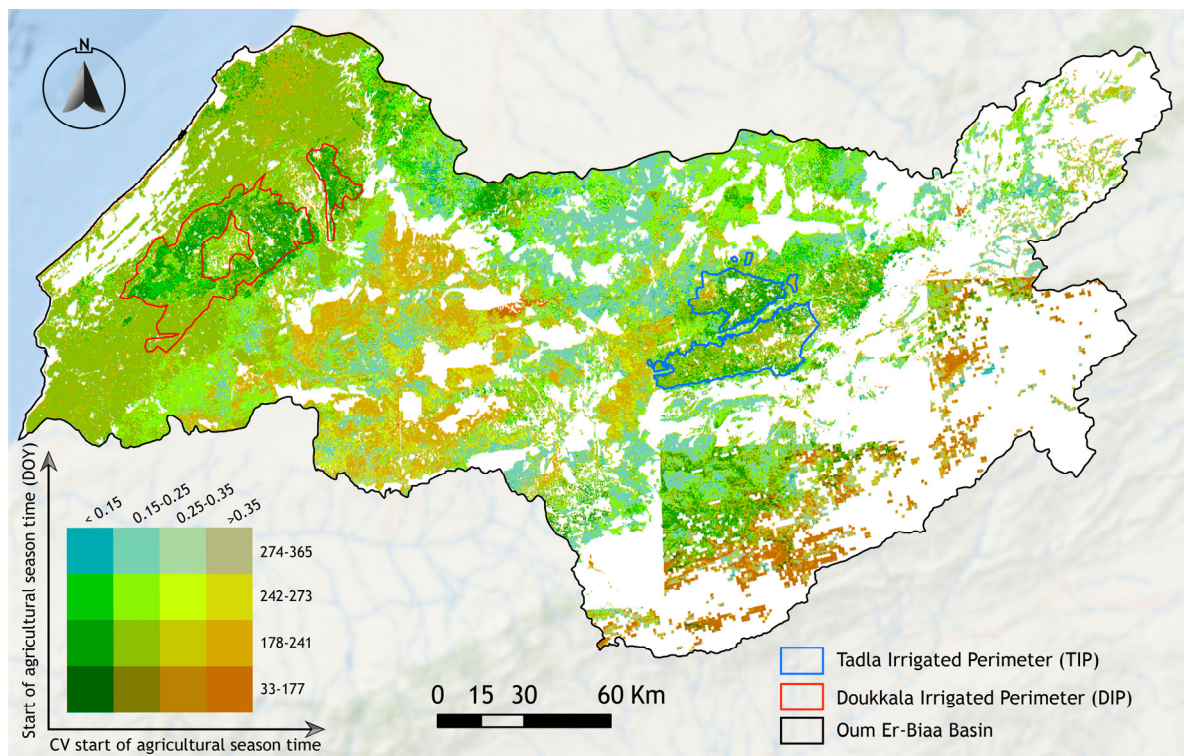

Figure S1. Bivariate map showing, simultaneously, the start of the season time and its coefficient of variation.

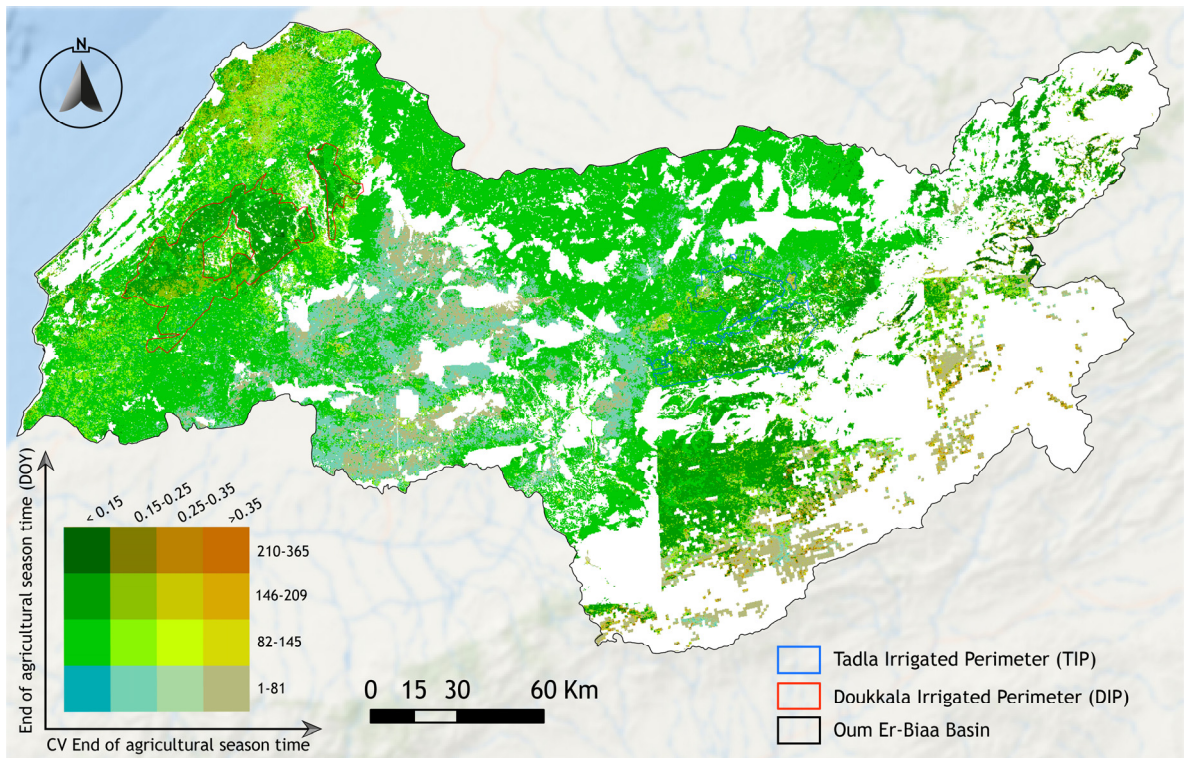

Figure S2. Bivariate map showing, simultaneously, the end of the season time and its coefficient of variation.

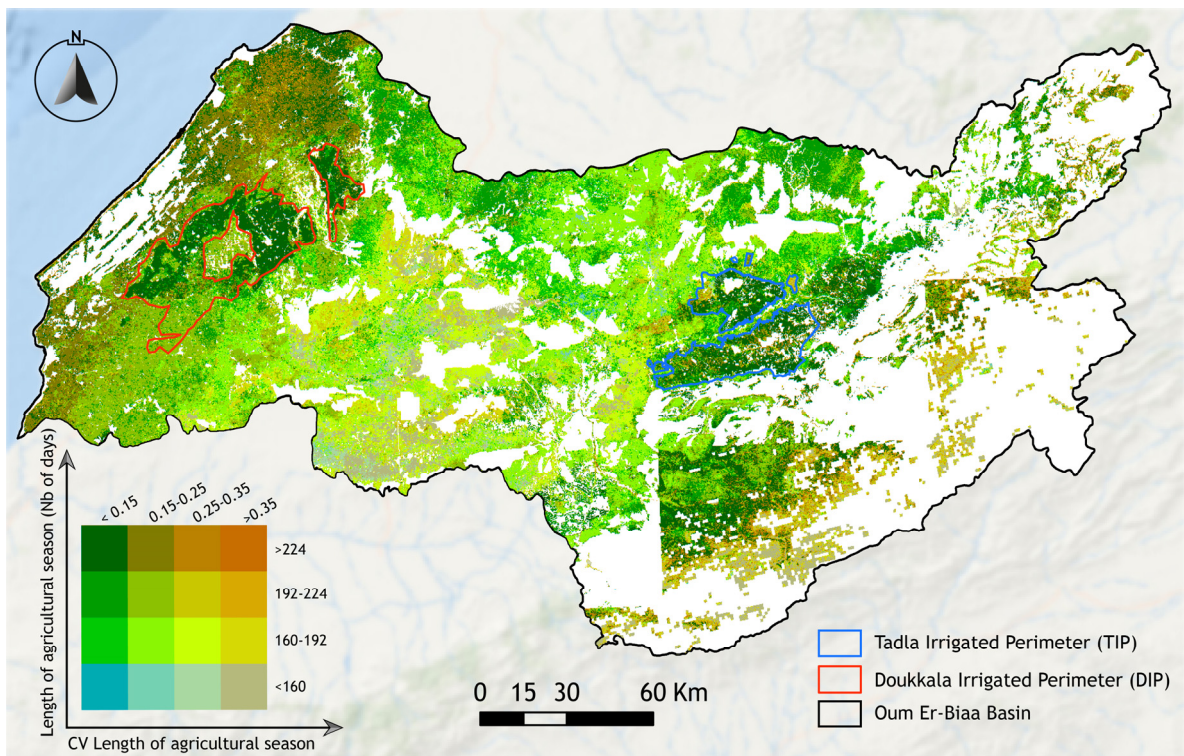

Figure S3. Bivariate map showing, simultaneously, the length of season and its coefficient of variation.



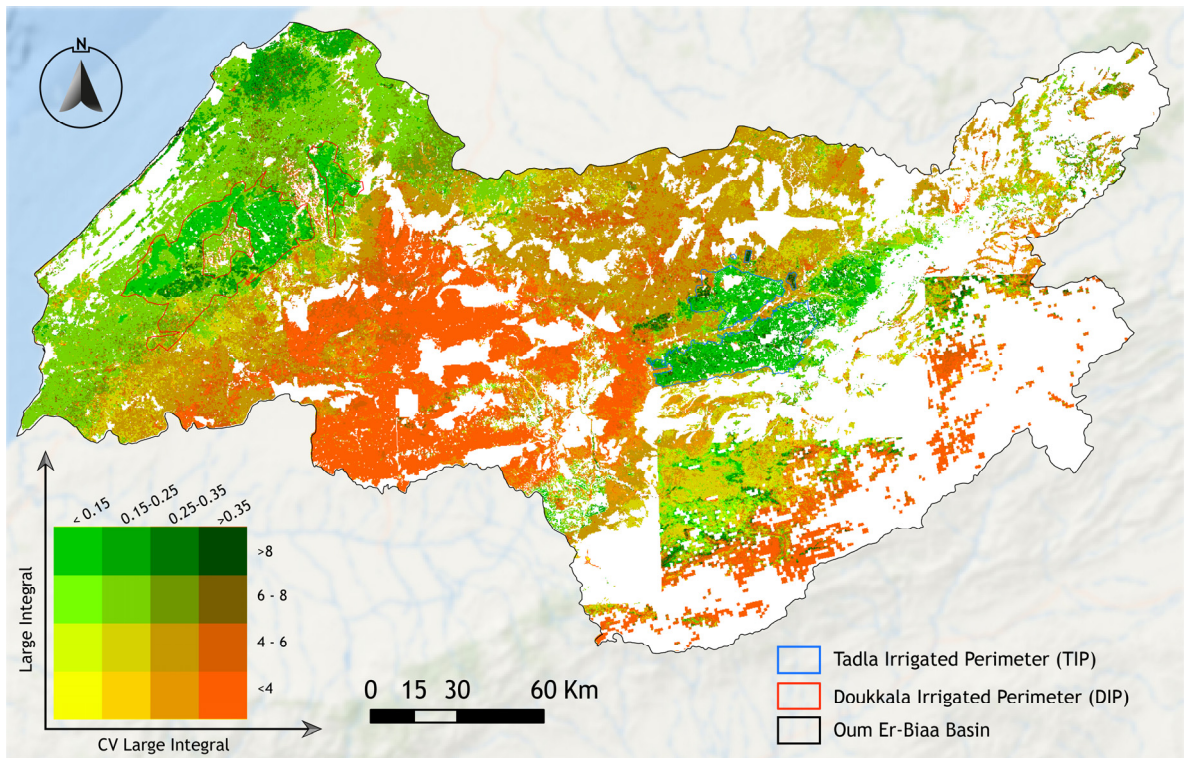

Figure S4. Bivariate map showing, simultaneously, the great integral metric and its coefficient of variation.

Figure S5: Classification result of the RF classifier for 2000/2001 cropping season.

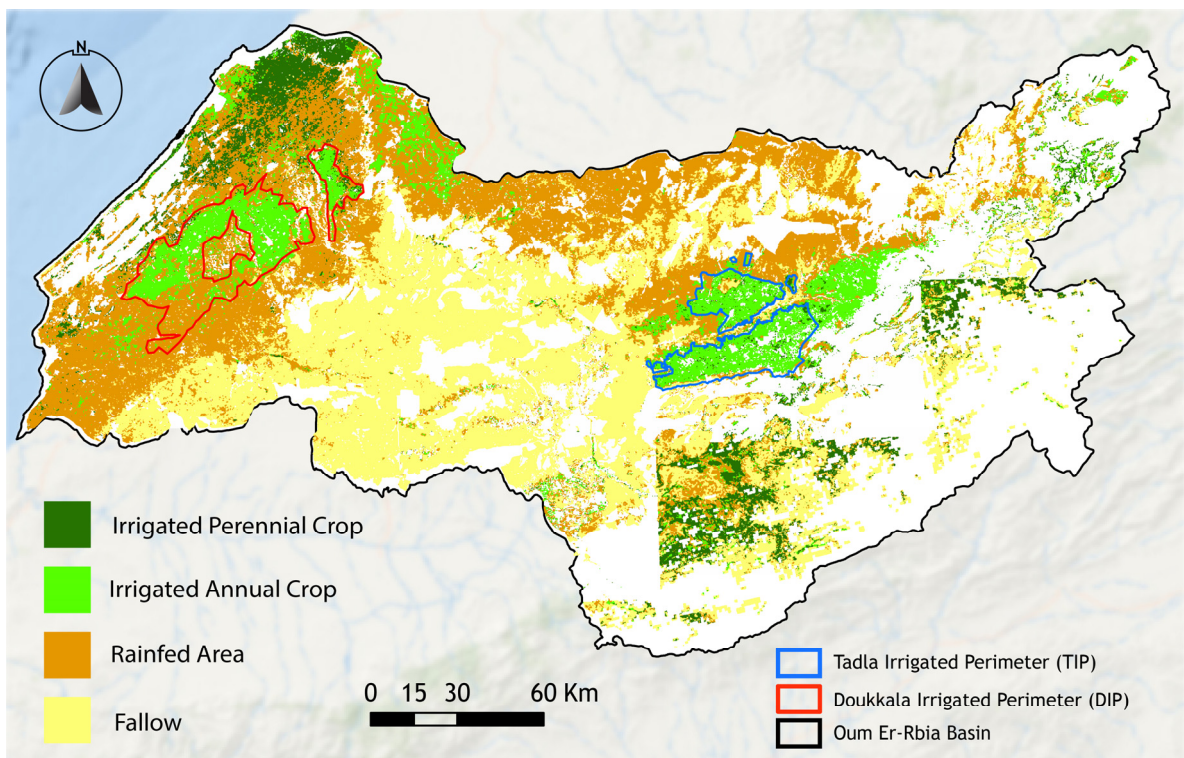

Figure S6: Classification result of the RF classifier for 2018/2019 cropping season.

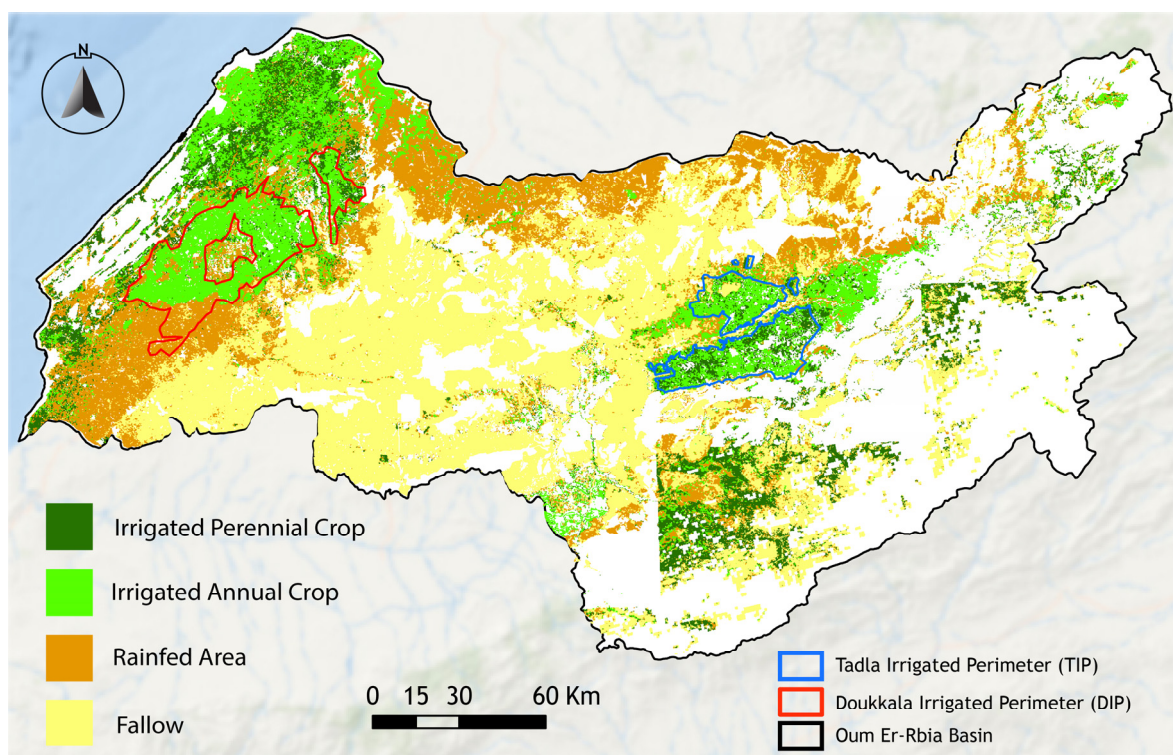

Table S7: Accuracy assessment of the 2000/2001 and 2018/2019 classification results

|              | 2000/2001 |      |      |      | 2018/2019 |      |      |      |
|--------------|-----------|------|------|------|-----------|------|------|------|
|              | IAC       | IPC  | RA   | FA   | IAC       | IPC  | RA   | FA   |
| <b>PA</b>    | 0.98      | 0.93 | 0.83 | 0.98 | 0.99      | 0.93 | 0.93 | 0.98 |
| <b>UA</b>    | 0.94      | 0.83 | 0.99 | 0.98 | 0.96      | 0.97 | 0.98 | 0.95 |
| <b>F1</b>    | 0.96      | 0.88 | 0.84 | 0.97 | 0.97      | 0.95 | 0.96 | 0.97 |
| <b>Kappa</b> | 0.91      |      |      |      | 0.95      |      |      |      |
| <b>OA</b>    | 0.93      |      |      |      | 0.97      |      |      |      |
